# Supplementary material for: Efficient removal of methylene blue dye using magnetized titanate nanotubes
Source: Royal Society of Chemistry journal article supplement (doi:10.1039/d6ra02268e), 2026-04-27
Supplement: d6ra02268e2.pdf [file d6ra02268e2.pdf]

Table S1. Force-field atom types assigned to the constituent atoms of Na<sub>2</sub>Ti<sub>3</sub>O<sub>7</sub>, CoFe<sub>2</sub>O<sub>4</sub>, and Methylene Blue dye used in the Monte Carlo adsorption simulations

| Atom                                           | Forcefield type |
|------------------------------------------------|-----------------|
| Na <sub>2</sub> Ti <sub>3</sub> O <sub>7</sub> |                 |
| Ti                                             | ti4o            |
| O                                              | o ti            |
| Na                                             | na+             |
| CoFe <sub>2</sub> O <sub>4</sub>               |                 |
| Co                                             | co2o            |
| Fe                                             | fe2o            |
| O                                              | o fe            |
| Methylene Blue dye                             |                 |
| C (aromatic C–H)                               | c3a             |
| C (aromatic C–C)                               | c3a             |
| C (methyl C)                                   | c               |
| C (other methyl C)                             | c4              |
| N (dimethyl amino)                             | n3              |
| N (thiazine N)                                 | n2a             |
| H (all hydrogens)                              | h1              |
